# Supplementary material
Source: publisher figshare collection journal article supplement (https://gsajournals.figshare.com/ndownloader/files/22365612)
Supplement: Supplementary file 1 [file 22365612]

**Supplemental Figures**

**
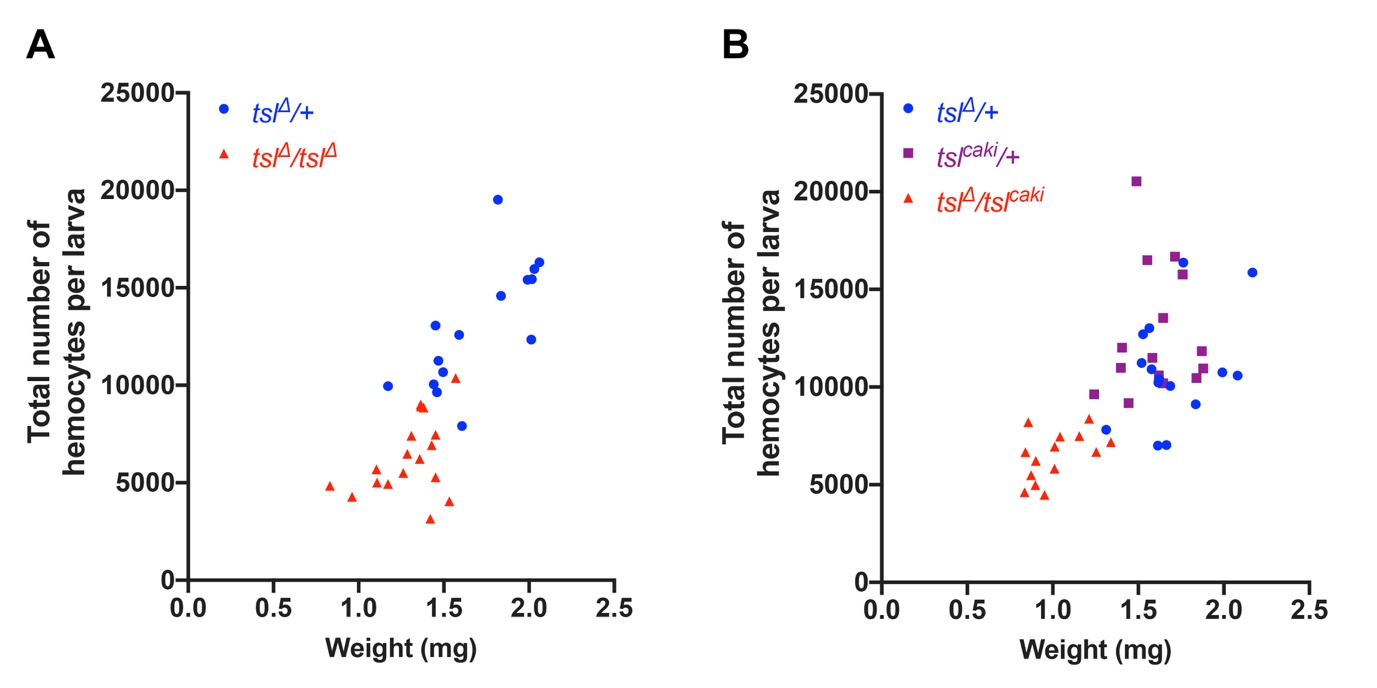
**

**Figure S1. Untransformed data relating to Figure 3.**

(**A**) Quantification of weight and total hemocyte number (*hmlΔ-dsRed*) in individual wandering *tslΔ/tslΔ* and *tslΔ*/+ larvae. Untransformed data from Figure 3A. (**B**) Quantification of weight and total hemocyte number (*hmlΔ-dsRed*) in individual wandering *tslΔ*/+, *tslcaki*/+ and *tslΔ*/*tslcaki* larvae. Untransformed data from Figure 3C.

**
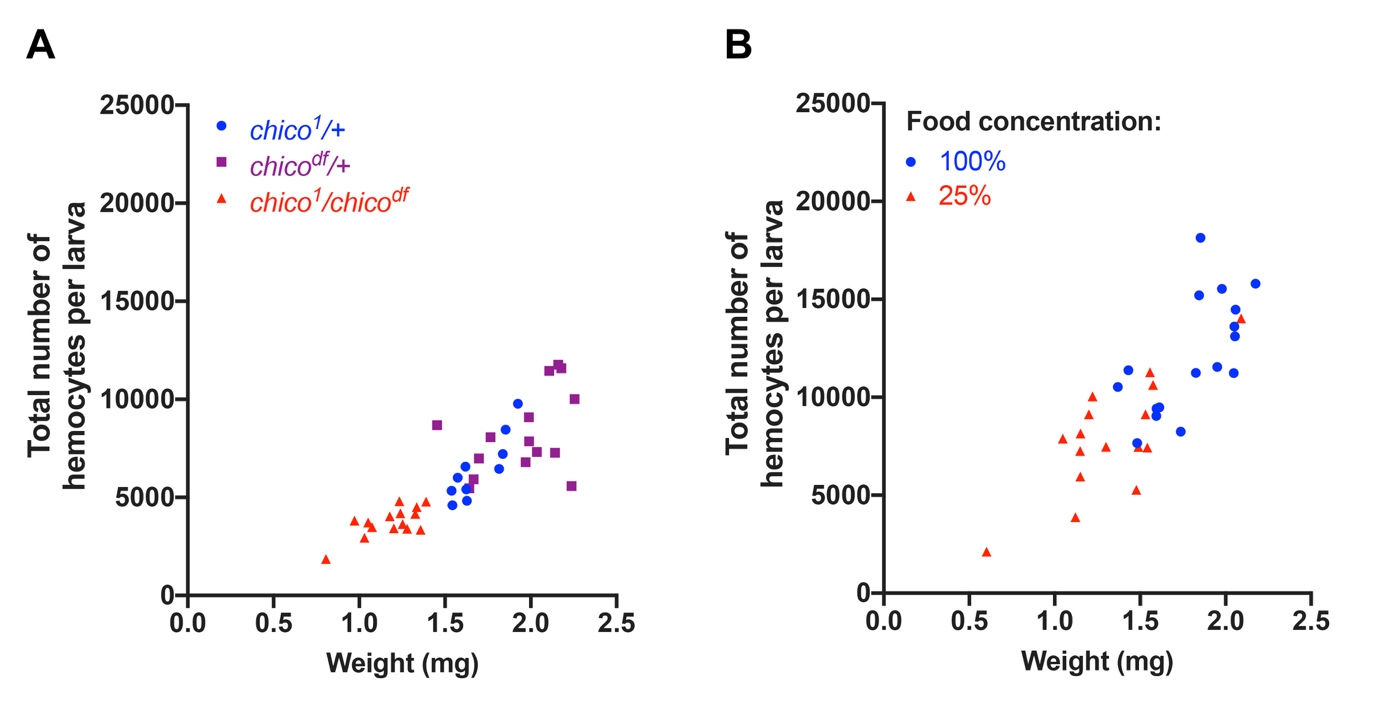
**

**Figure S2. Untransformed data relating to Figure 4.**

(**A**) Quantification of weight and total hemocyte number (*hmlΔ-GAL4>UAS-GFP*) in individual wandering *chico1/+*, *chicodf/+*and *chico1/chicodf* larvae. Untransformed data from Figure 4C. (**B**) Quantification of weight and total hemocyte number (*hmlΔ-dsRed*) in individual wandering larvae raised on a standard (100%) or diluted (25%) diet. Untransformed data from Figure 4F.

**
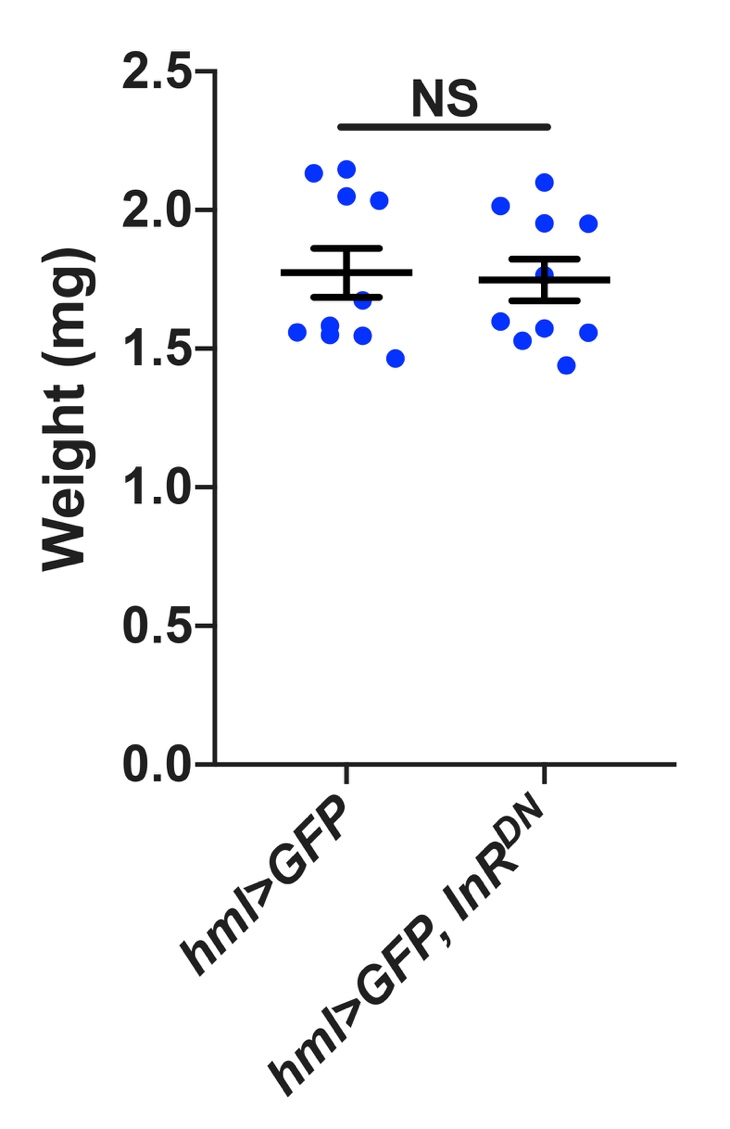
**

**Figure S3. Expression of *InRDN* in larval hemocytes has no effect on body size.**

Wandering *hml>GFP, InRDN* larvae are similar in size to *hml>GFP* controls (p=0.739). NS, not significant, Mann-Whitney test. Data points are individual larvae (n=10) with the means ±1 standard error indicated.
